# Supplementary material
Source: Springer Nature journal article supplement (https://www.springermedizin.de/resource/supplementary/12874_2011_641_MOESM1_ESM.PDF/9432304)
Supplement: MOESM1 [file 9432304]

|                | Breast cancer (C50)                                                                          |                                                                                                                                                                                                                                                                                                                           | Melanoma (C43)                                                                               |                                                                                                                                                       |
|----------------|----------------------------------------------------------------------------------------------|---------------------------------------------------------------------------------------------------------------------------------------------------------------------------------------------------------------------------------------------------------------------------------------------------------------------------|----------------------------------------------------------------------------------------------|-------------------------------------------------------------------------------------------------------------------------------------------------------|
|                | TNM5                                                                                         | TNM6                                                                                                                                                                                                                                                                                                                      | TNM5                                                                                         | TNM6                                                                                                                                                  |
| <b>T-stage</b> |                                                                                              |                                                                                                                                                                                                                                                                                                                           |                                                                                              |                                                                                                                                                       |
| 1              | Greatest dimension $\leq$ 2cm                                                                |                                                                                                                                                                                                                                                                                                                           | Thickness $\leq$ 0.75 mm and invades the papillary dermis                                    | Thickness $\leq$ 1 mm                                                                                                                                 |
| 2              | 2 – 5cm                                                                                      |                                                                                                                                                                                                                                                                                                                           | 0.75-1.5mm or invades to the papillary-reticular dermal interface                            | 1-2mm                                                                                                                                                 |
| 3              | > 5 cm                                                                                       |                                                                                                                                                                                                                                                                                                                           | 1.5-4mm or invades the reticular dermis                                                      | 2-4mm                                                                                                                                                 |
| 4              | Invades adjacent tissue                                                                      |                                                                                                                                                                                                                                                                                                                           | >4mm or invades the subcutaneous tissue or satellite within 2cm of the primary tumour        | > 4mm                                                                                                                                                 |
| X              | Cannot be assessed                                                                           |                                                                                                                                                                                                                                                                                                                           | Cannot be assessed                                                                           | Cannot be assessed                                                                                                                                    |
| <b>N-stage</b> |                                                                                              |                                                                                                                                                                                                                                                                                                                           |                                                                                              |                                                                                                                                                       |
| 0              | No regional lymph node metastasis                                                            | No regional lymph node metastasis                                                                                                                                                                                                                                                                                         | No regional lymph node metastasis                                                            | No regional lymph node metastasis                                                                                                                     |
| 1              | Metastasis to movable ipsilateral axillary lymph node(s)                                     | Metastasis to movable ipsilateral axillary lymph node(s)                                                                                                                                                                                                                                                                  | Metastasis $\leq$ 3cm in greatest dimension in any regional lymph node(s)                    | 1 regional lymph node metastasis                                                                                                                      |
| 2              | Metastasis to ipsilateral axillary lymph node(s) fixed to one another or to other structures | Metastasis to ipsilateral axillary lymph node(s) fixed to one another or to other structures, or to clinically apparent ipsilateral internal mammary lymph nodes without axillary nodes                                                                                                                                   | Metastasis >3cm in greatest dimension in any regional lymph node(s) or in-transit metastasis | 2-3 regional lymph node metastases or satellite or in-transit metastasis without metastasis in lymph node(s)                                          |
| 3              | Metastases to ipsilateral internal mammary lymph node(s)                                     | Metastasis to ipsilateral infraclavicular lymph node(s) with or without axillary lymph node(s), or to clinically apparent ipsilateral internal mammary lymph nodes with axillary nodes, or metastasis to ipsilateral supraclavicular lymph node(s) with or without axillary lymph nodes or internal mammary lymph node(s) | -                                                                                            | > 4 lymph node metastasis, or matted metastatic regional lymph nodes, or satellite or in-transit metastasis with metastasis in regional lymph node(s) |
| X              | Cannot be assessed                                                                           | Cannot be assessed                                                                                                                                                                                                                                                                                                        | Cannot be assessed                                                                           | Cannot be assessed                                                                                                                                    |
| <b>M-stage</b> |                                                                                              |                                                                                                                                                                                                                                                                                                                           |                                                                                              |                                                                                                                                                       |
| 0              | No distant metastasis                                                                        |                                                                                                                                                                                                                                                                                                                           | No distant metastasis                                                                        |                                                                                                                                                       |
| 1              | Distant metastasis                                                                           |                                                                                                                                                                                                                                                                                                                           | Distant metastasis                                                                           |                                                                                                                                                       |
| X              | Cannot be assessed                                                                           |                                                                                                                                                                                                                                                                                                                           | Cannot be assessed                                                                           |                                                                                                                                                       |
